# Supplementary material for: N-Doped carbon dots: green and efficient synthesis on a large-scale and their application in fluorescent pH sensing
Source: Royal Society of Chemistry journal article supplement (doi:10.1039/c7nj01889d), 2017-01-01
Supplement: c7nj01889d1.pdf [file c7nj01889d1.pdf]

## Electronic Supplementary Information

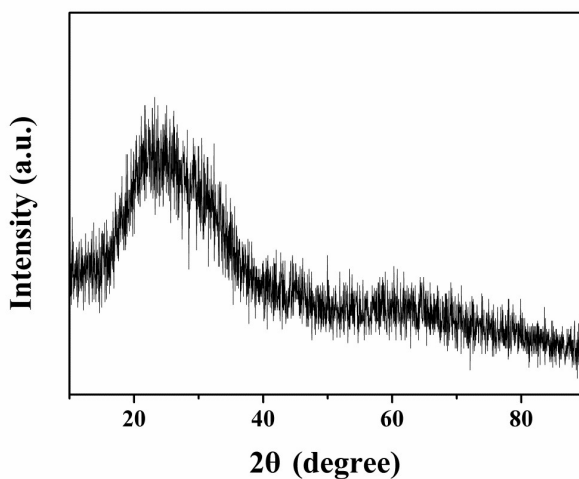

**Fig. S1.** The XRD pattern of N-CDs

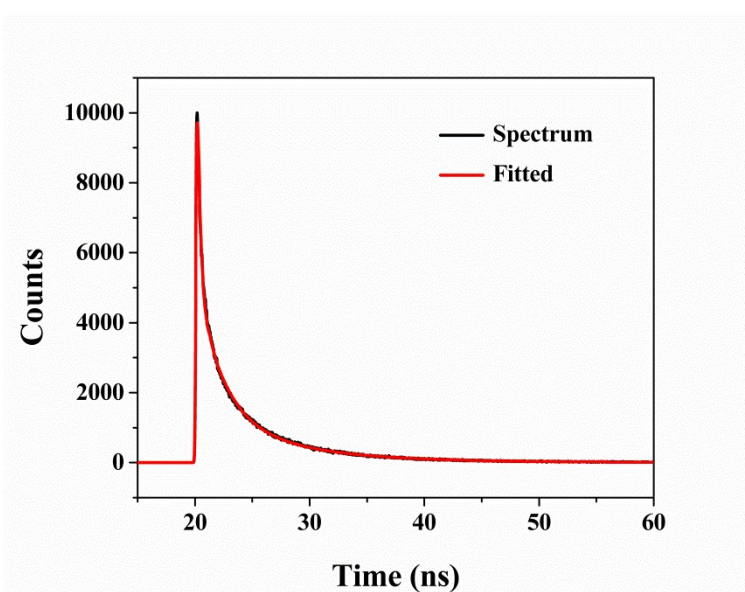

**Fig. S2.** Time-resolved fluorescence decay of N-CDs
